# Supplementary material for: A mechanism‐based pharmacokinetic model of remdesivir leveraging interspecies scaling to simulate COVID‐19 treatment in humans
Source: PubMed Central journal article supplement — CPT Pharmacometrics Syst Pharmacol. 2021 Jan 25;10(2):89–99. doi: 10.1002/psp4.12584 (PMC7894405; doi:10.1002/psp4.12584), 2021-01-25
Supplement: PSP4-10-89-s001.pdf [file PSP4-10-89-s001.pdf]

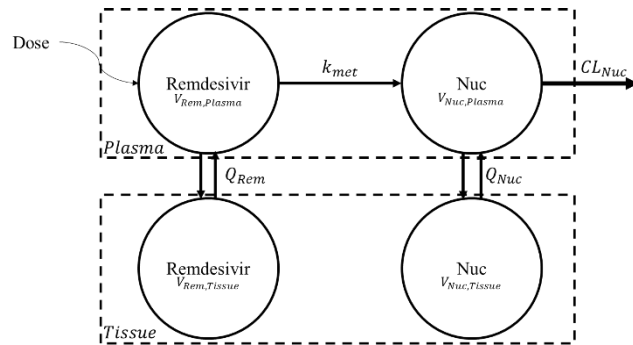

**Figure S1. Pharmacokinetic Human Model Schematic of Remdesivir and Metabolites.** Intravenous dosing of remdesivir is described by a two-compartment model with linear distribution,  $Q_{Rem}$ , between plasma,  $V_{Rem,Plasma}$ , and tissue,  $V_{Rem,Tissue}$ . Remdesivir is irreversibly metabolized to GS-441524 metabolite (Nuc) via a first-order rate constant,  $k_{met}$ . This metabolite is characterized by a two-compartment model with linear distribution,  $Q_{Nuc}$ , between plasma,  $V_{Nuc,Plasma}$ , and tissue,  $V_{Nuc,Tissue}$ . Nuc is eliminated linearly from plasma at rate  $CL_{Nuc}$ .
