# Supplementary material for: A mechanism‐based pharmacokinetic model of remdesivir leveraging interspecies scaling to simulate COVID‐19 treatment in humans
Source: PubMed Central journal article supplement — CPT Pharmacometrics Syst Pharmacol. 2021 Jan 25;10(2):89–99. doi: 10.1002/psp4.12584 (PMC7894405; doi:10.1002/psp4.12584), 2021-01-25
Supplement: PSP4-10-89-s002.pdf [file PSP4-10-89-s002.pdf]

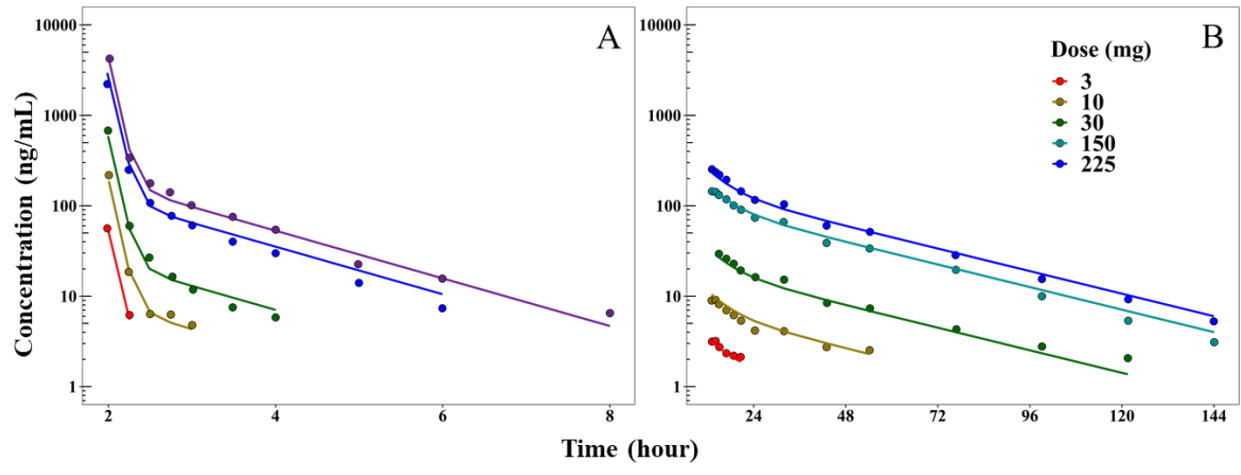

**Figure S2. Human Pharmacokinetic Model Fits.** Semi-log plot of concentration of mean remdesivir and its nucleoside metabolites versus time in healthy human volunteers following a single 2-hour intravenous infusion of remdesivir. Model fits (lines) of observed data (points) are shown for total plasma concentration of (A) remdesivir and (B) nucleoside after a single dose.
